# Supplementary material for: Reactions of hydroxyl radicals with benzoic acid and benzoate
Source: Royal Society of Chemistry journal article supplement (doi:10.1039/c7ra05488b), 2017-01-01
Supplement: c7ra05488b1.pdf [file c7ra05488b1.pdf]

Supporting information for

## **Reactions of Hydroxyl Radicals with Benzoic Acid and Benzoate**

Chongchong Wu<sup>a</sup>, Alex De Visscher<sup>a, b</sup>, Ian Donald Gates<sup>a\*</sup>

<sup>a</sup>Department of Chemical and Petroleum Engineering

<sup>b</sup>Department of Chemical and Materials Engineering, Concordia University, Montreal, QC

Corresponding Author:

Ian Gates

Phone: +1-403-220-5752

Email: [ian.gates@ucalgary.ca](mailto:ian.gates@ucalgary.ca)

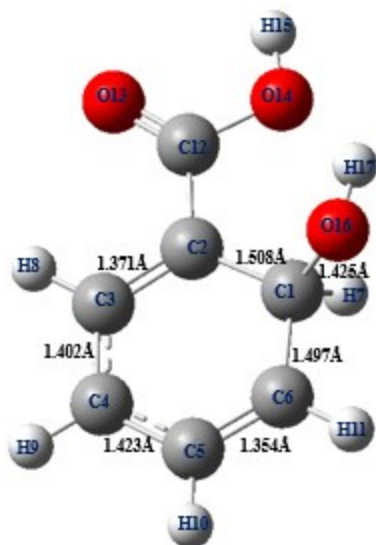

(a) o-add

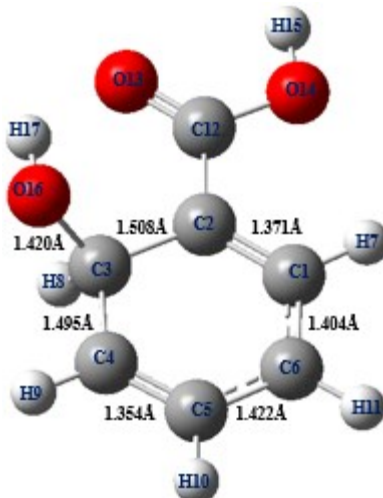

(b) o2-add

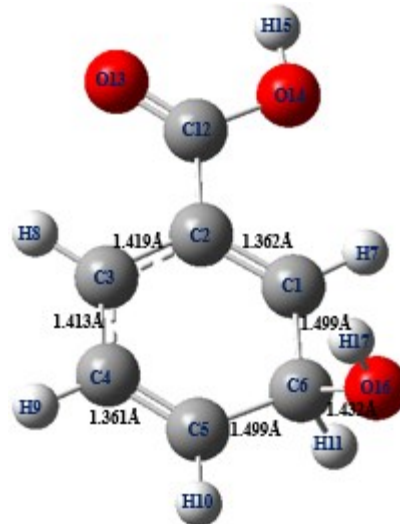

(c) m-add

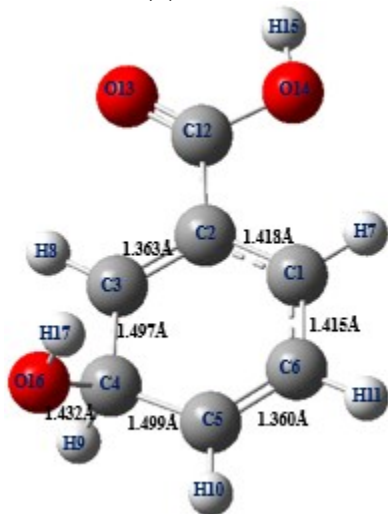

(d) m2-add

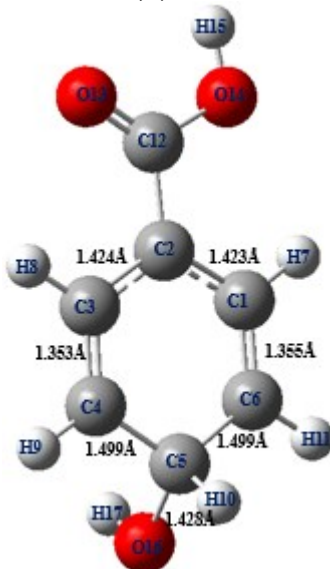

(e) p-add

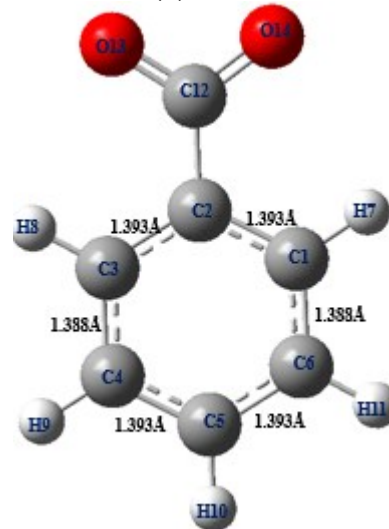

(f) H-abs

**Fig. S1** Product complexes (Benzoic acid gas phase)

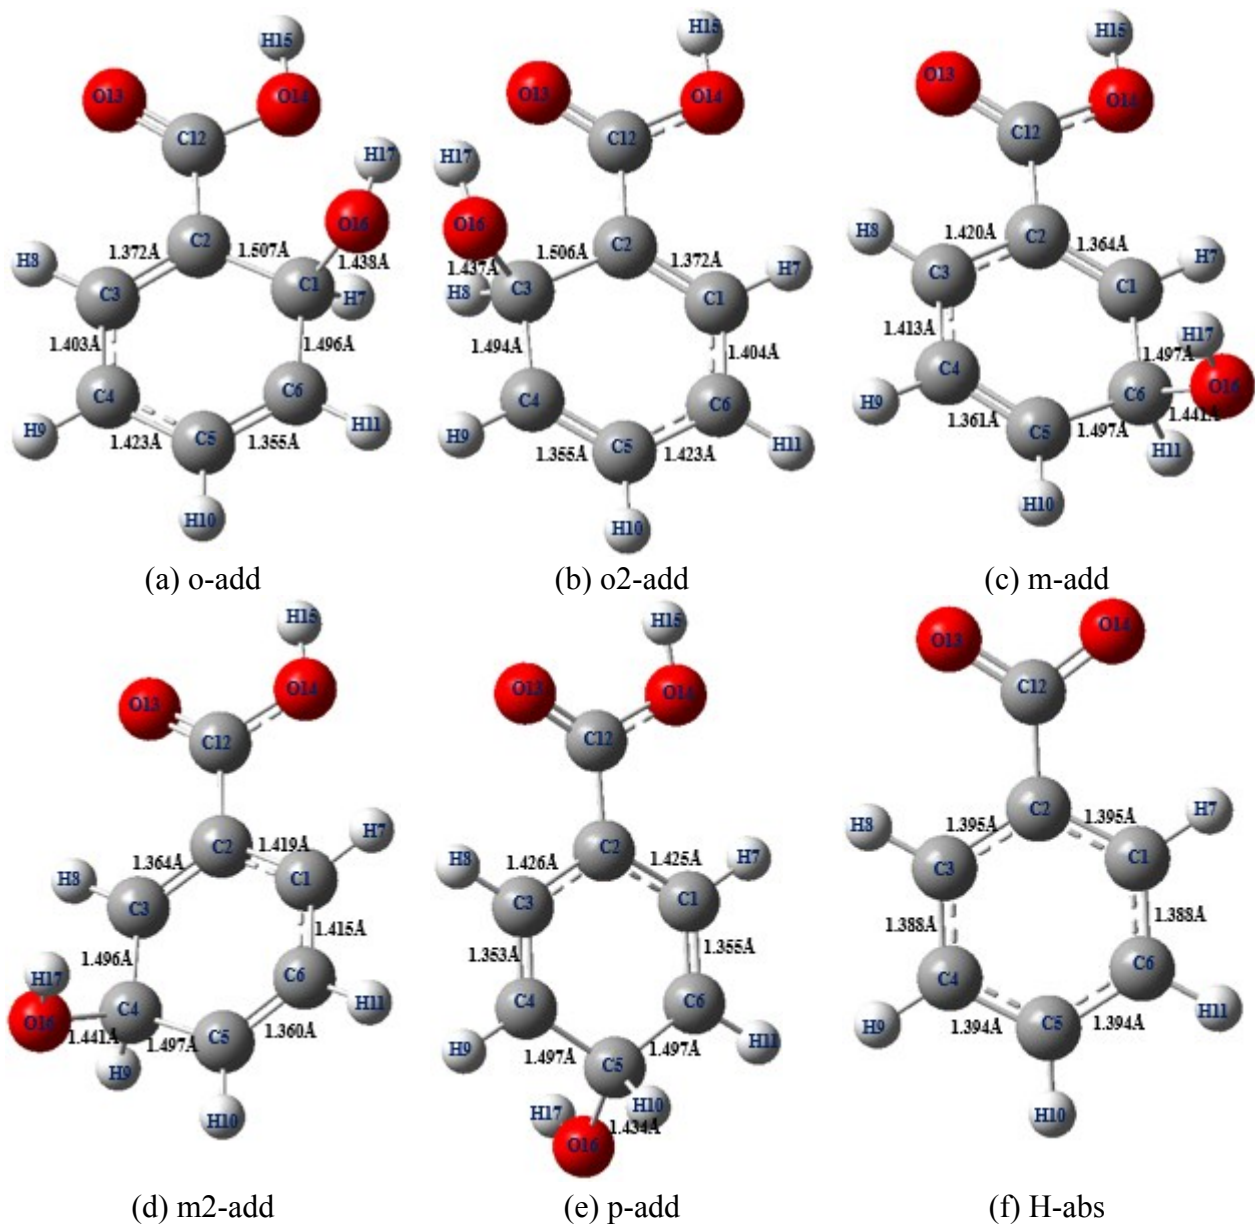

Fig. S2 Product complexes (Benzoic acid aqueous phase)

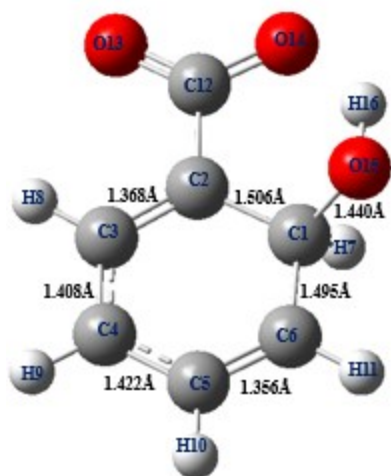

(a) o-add

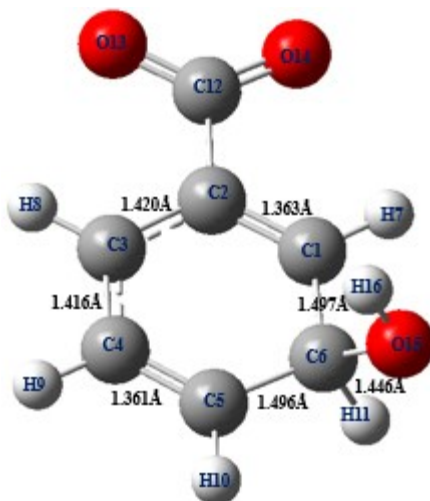

(b) m-add

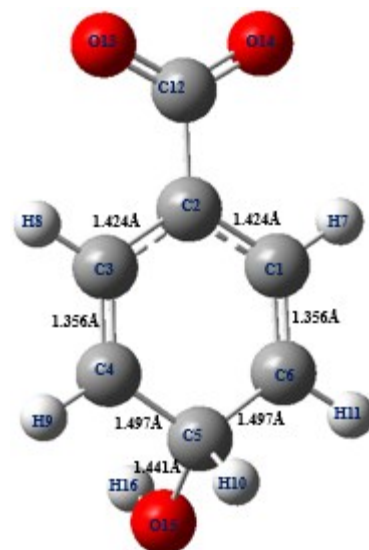

(c) p-add

Fig. S3 Product complexes (Benzoate aqueous phase)

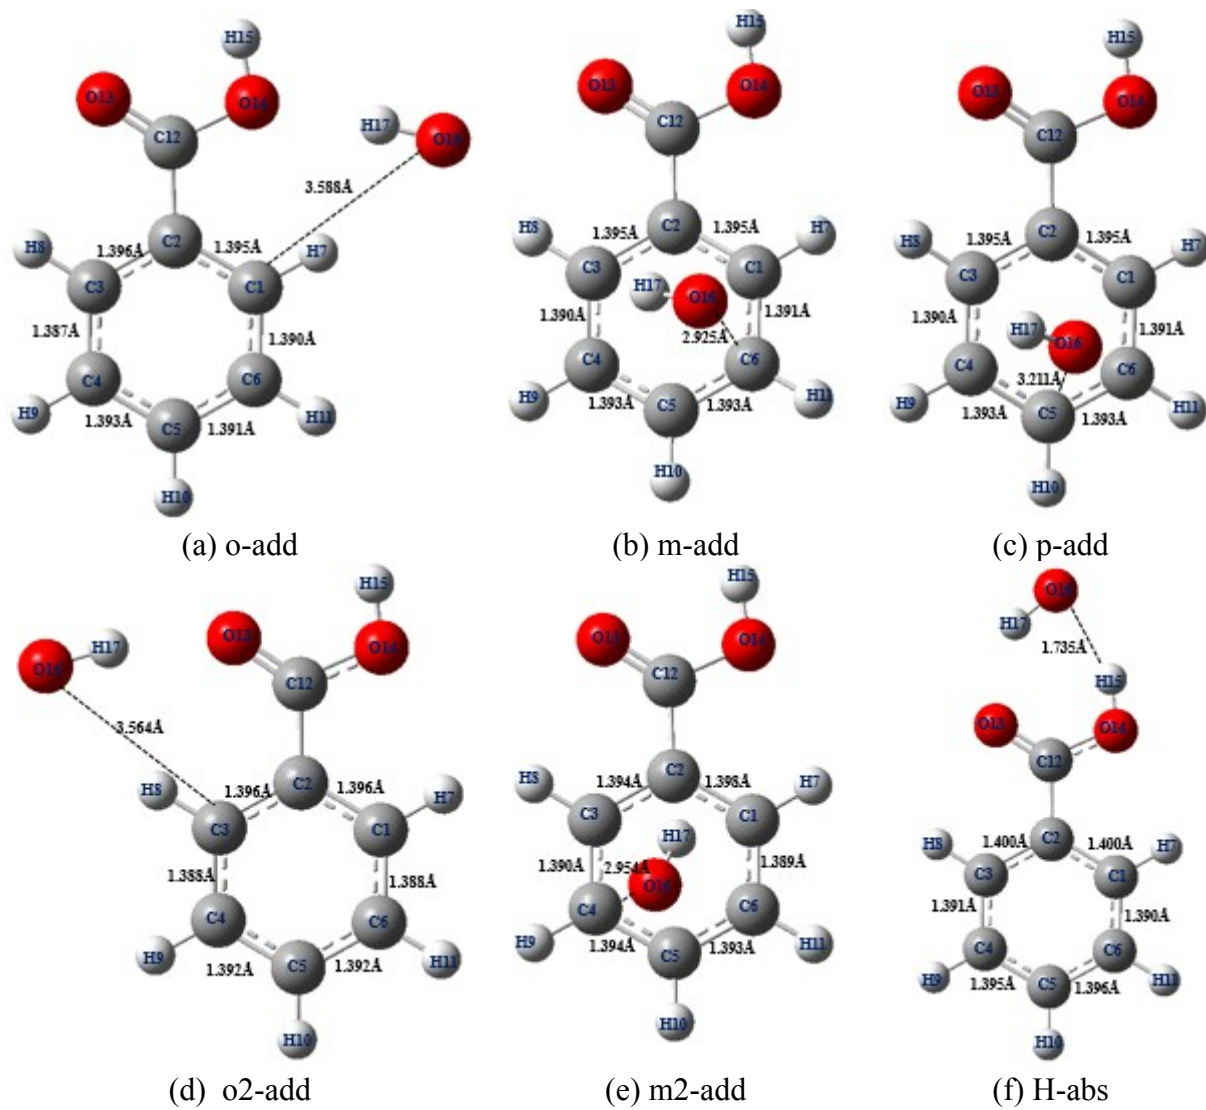

Fig. S4 Pre-reactive complexes (Benzoic acid gas phase)

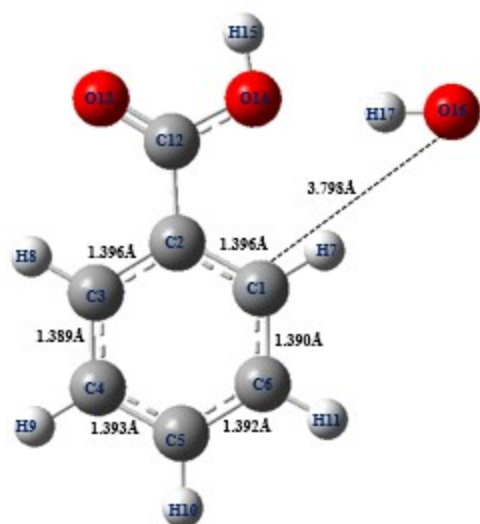

(a) o-add

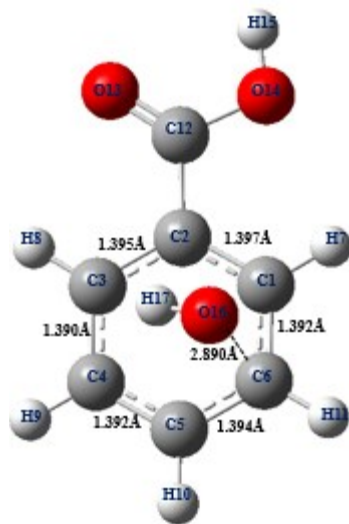

(b) m-add

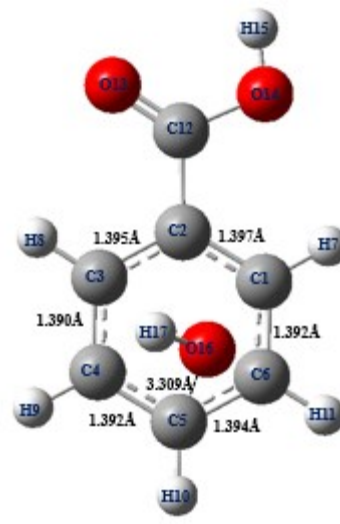

(c) p-add

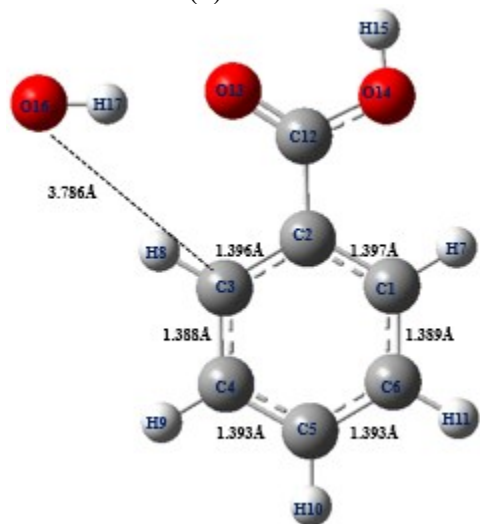

(d) o2-add

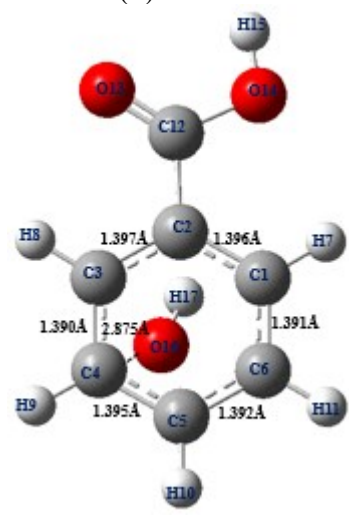

(e) m2-add

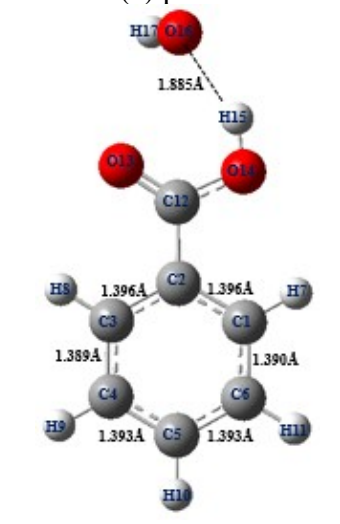

(f) H-abs

Fig. S5 Pre-reactive complexes (Benzoic acid aqueous phase)

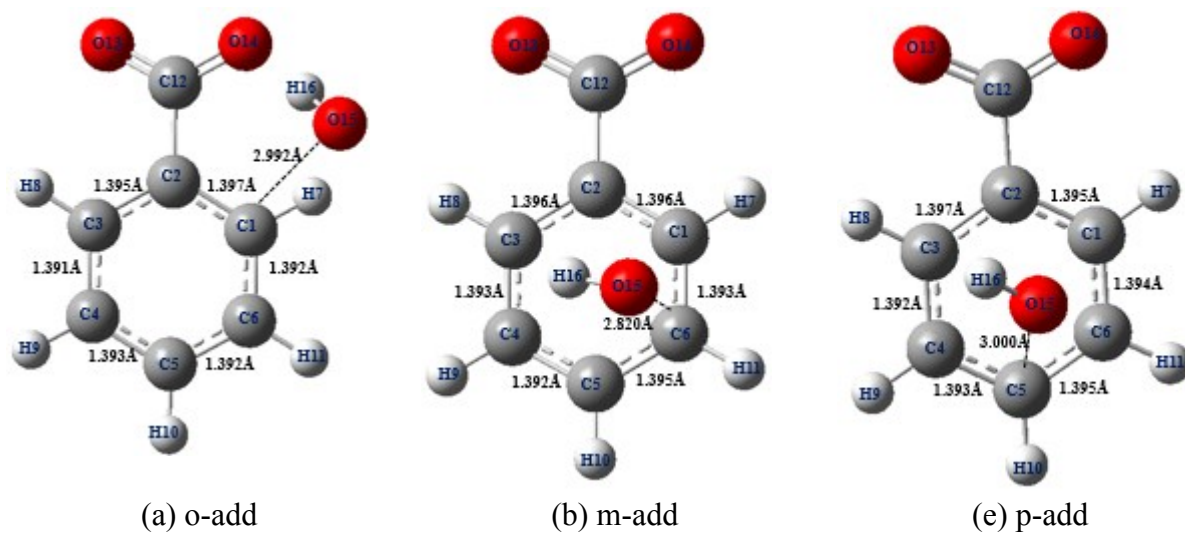

Fig. S6 Pre-reactive complexes (Benzoate aqueous phase)

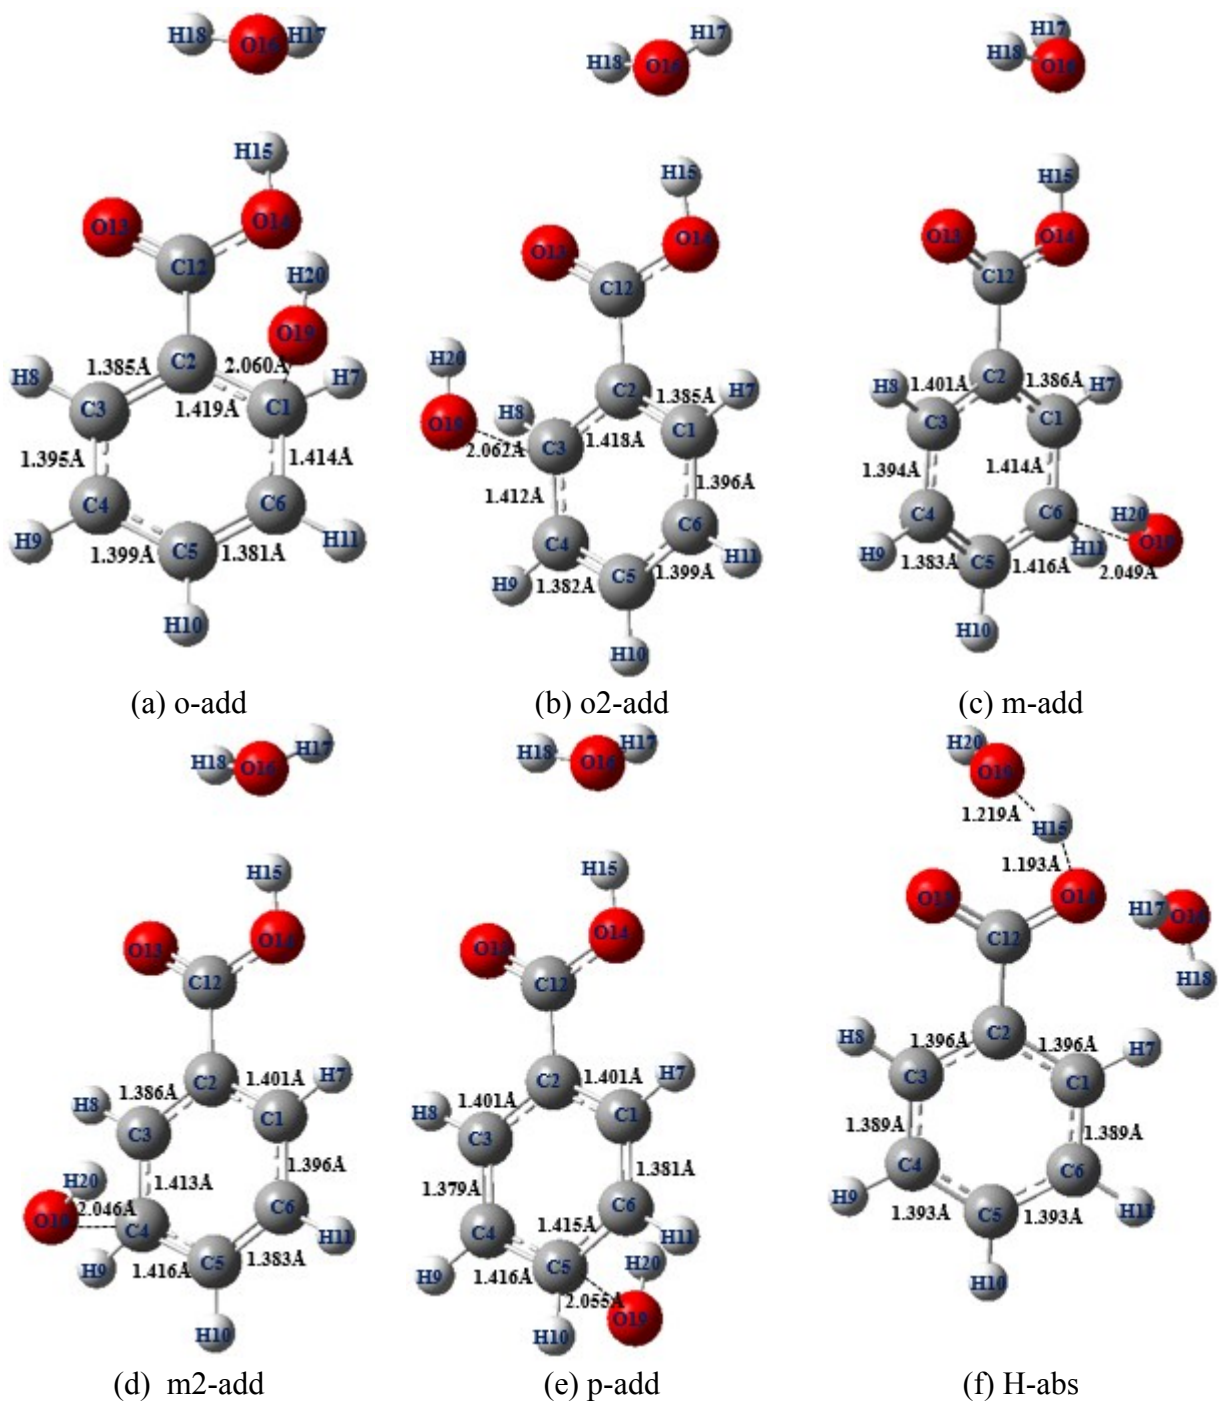

Fig. S7 Transitions states with one explicit water molecule (Benzoic acid aqueous phase)



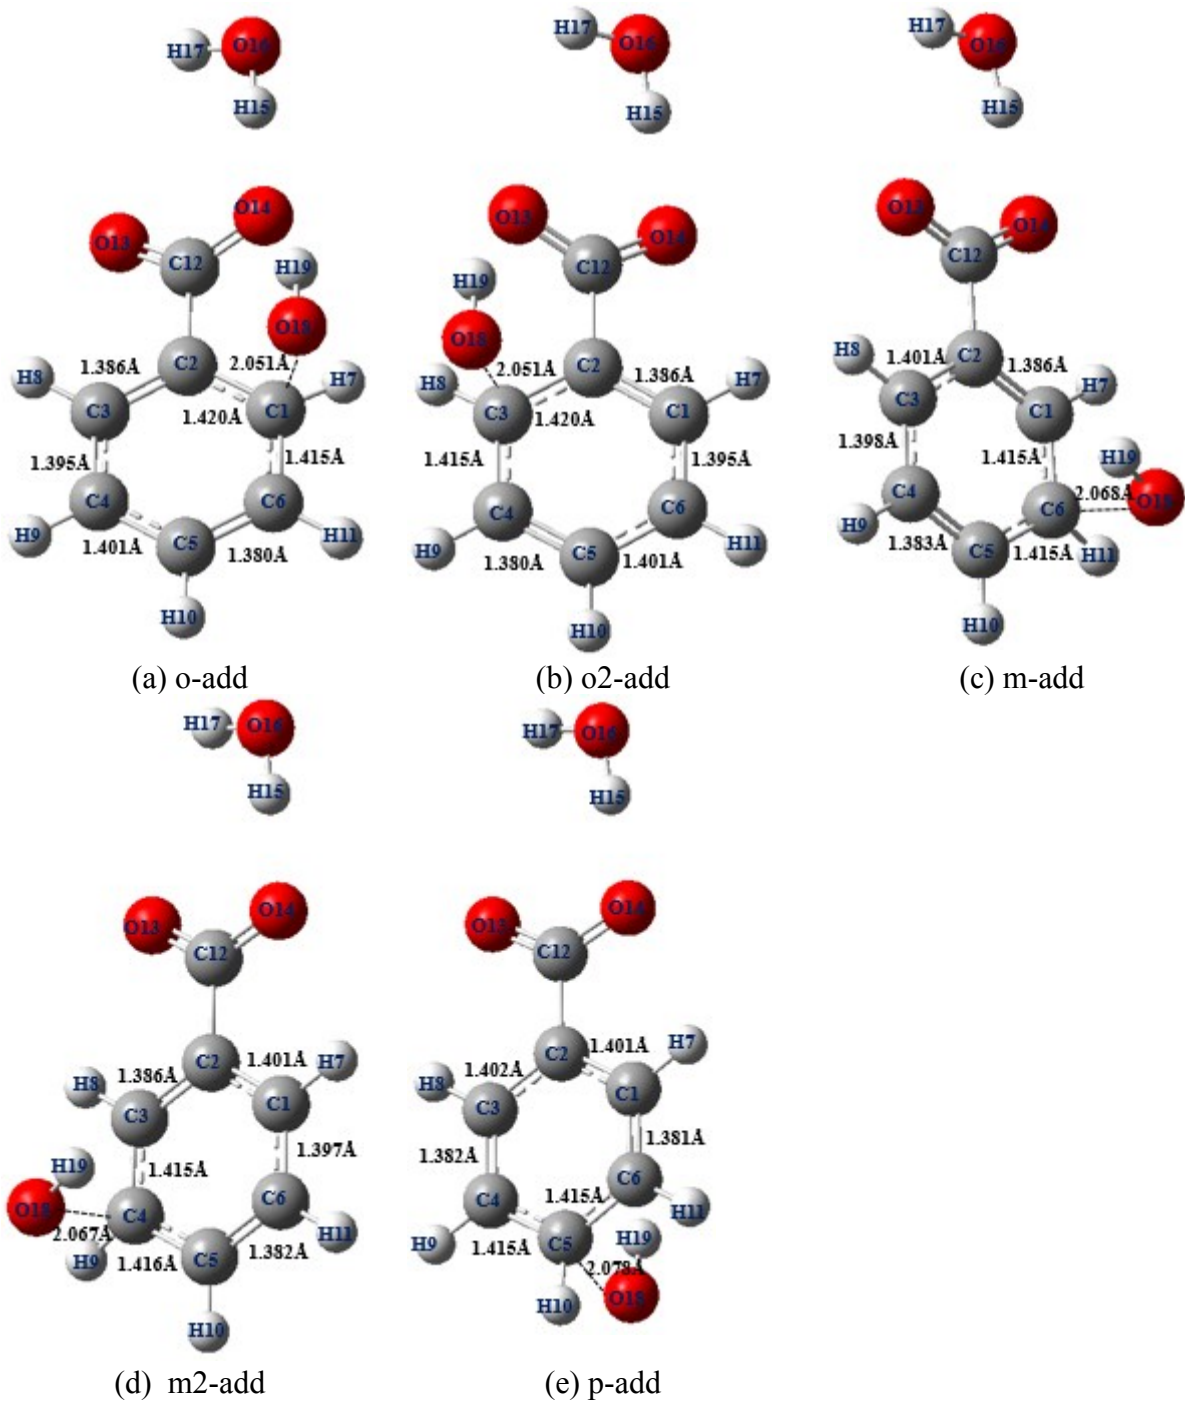

**Fig. S8** Transitions states with one explicit water molecule (Benzoate aqueous phase)

**Table S1.** Relative energy (Re: Kcal/mol) to isolated reactants for benzoic acid reacting with OH radicals in the gas phase.

| Species                       | Re     | Species                       | Re     |
|-------------------------------|--------|-------------------------------|--------|
| o-add pre-reactant complexes  | -2.85  | m2-add pre-reactant complexes | -3.04  |
| o-add transition states       | 3.30   | m2-add transition states      | 2.56   |
| o-add adducts                 | -18.92 | m2-add adducts                | -15.88 |
| o2-add pre-reactant complexes | -5.46  | p-add pre-reactant complexes  | -3.15  |
| o2-add transition states      | 2.75   | p-add transition states       | 2.38   |
| o2-add adducts                | -20.34 | p-add adducts                 | -16.91 |
| m-add pre-reactant complexes  | -3.17  | H-abs pre-reactant complexes  | -2.87  |
| m-add transition states       | 2.40   | H-abs transition states       | 3.90   |
| m-add adducts                 | -16.15 | H-abs adducts                 | -11.67 |

**Table S2.** Relative energy (Re: Kcal/mol) to isolated reactants for benzoic acid reacting with OH radicals in the aqueous phase.

| Species                       | Re     | Species                       | Re     |
|-------------------------------|--------|-------------------------------|--------|
| o-add pre-reactant complexes  | -0.56  | m2-add pre-reactant complexes | -1.99  |
| o-add transition states       | 2.59   | m2-add transition states      | 2.11   |
| o-add adducts                 | -17.83 | m2-add adducts                | -14.75 |
| o2-add pre-reactant complexes | -2.61  | p-add pre-reactant complexes  | -2.02  |
| o2-add transition states      | 2.39   | p-add transition states       | 2.46   |
| o2-add adducts                | -18.30 | p-add adducts                 | -18.03 |
| m-add pre-reactant complexes  | -2.02  | H-abs pre-reactant complexes  | -2.87  |
| m-add transition states       | 1.97   | H-abs transition states       | 4.27   |
| m-add adducts                 | -14.83 | H-abs adducts                 | -2.99  |

**Table S3.** Relative energy (Re: Kcal/mol) to isolated reactants for benzoate reacting with OH radicals in the aqueous phase.

| Species                      | Re     | Species                      | Re     |
|------------------------------|--------|------------------------------|--------|
| o-add pre-reactant complexes | -5.80  | p-add pre-reactant complexes | -2.08  |
| o-add transition states      | 0.15   | p-add transition states      | 1.04   |
| o-add adducts                | -18.43 | p-add adducts                | -17.27 |
| m-add pre-reactant complexes | -2.20  |                              |        |
| m-add transition states      | 1.02   |                              |        |
| m-add adducts                | -15.2  |                              |        |

**Table S4.** The  $\langle S^2 \rangle$  values for open-shell systems for benzoic acid reacting with OH radicals in the gas phase.

| Species                       | $\langle S^2 \rangle$ | Species                       | $\langle S^2 \rangle$ |
|-------------------------------|-----------------------|-------------------------------|-----------------------|
| o-add pre-reactant complexes  | 0.7528                | m2-add pre-reactant complexes | 0.7532                |
| o-add transition states       | 0.7866                | m2-add transition states      | 0.7840                |
| o-add adducts                 | 0.7850                | m2-add adducts                | 0.7875                |
| o2-add pre-reactant complexes | 0.7527                | p-add pre-reactant complexes  | 0.7532                |
| o2-add transition states      | 0.7871                | p-add transition states       | 0.7861                |
| o2-add adducts                | 0.7841                | p-add adducts                 | 0.7796                |
| m-add pre-reactant complexes  | 0.7532                | H-abs pre-reactant complexes  | 0.7528                |
| m-add transition states       | 0.7839                | H-abs transition states       | 0.7596                |
| m-add adducts                 | 0.7866                | H-abs adducts                 | 0.7598                |

**Table S5.** The  $\langle S^2 \rangle$  values for open-shell systems for benzoic acid reacting with OH radicals in the aqueous phase.

| Species                       | $\langle S^2 \rangle$ | Species                       | $\langle S^2 \rangle$ |
|-------------------------------|-----------------------|-------------------------------|-----------------------|
| o-add pre-reactant complexes  | 0.7527                | m2-add pre-reactant complexes | 0.7535                |
| o-add transition states       | 0.7817                | m2-add transition states      | 0.7797                |
| o-add adducts                 | 0.7830                | m2-add adducts                | 0.7877                |
| o2-add pre-reactant complexes | 0.7527                | p-add pre-reactant complexes  | 0.7535                |
| o2-add transition states      | 0.7817                | p-add transition states       | 0.7824                |
| o2-add adducts                | 0.7827                | p-add adducts                 | 0.7783                |
| m-add pre-reactant complexes  | 0.7535                | H-abs pre-reactant complexes  | 0.7533                |
| m-add transition states       | 0.7796                | H-abs transition states       | 0.7592                |
| m-add adducts                 | 0.7871                | H-abs transition states       | 0.7597                |

**Table S6.** The  $\langle S^2 \rangle$  values for open-shell systems for benzoate reacting with OH radicals in the aqueous phase.

| Species                      | $\langle S^2 \rangle$ | Species                      | $\langle S^2 \rangle$ |
|------------------------------|-----------------------|------------------------------|-----------------------|
| o-add pre-reactant complexes | 0.7529                | p-add pre-reactant complexes | 0.7538                |
| o-add transition states      | 0.7802                | p-add transition states      | 0.7784                |
| o-add adducts                | 0.7834                | p-add adducts                | 0.7789                |
| m-add pre-reactant complexes | 0.7538                |                              |                       |
| m-add transition states      | 0.7777                |                              |                       |
| m-add adducts                | 0.7844                |                              |                       |

**Table S7.** Reaction rate constants of benzoic acid (BA) and benzoate (BZ) with hydroxyl radical.

| Reaction path | BA gas phase<br>( $\text{cm}^3 \text{ molecule}^{-1} \text{ s}^{-1}$ ) | BA aqueous phase<br>( $\text{M}^{-1}\text{s}^{-1}$ ) | BZ aqueous phase<br>( $\text{M}^{-1}\text{s}^{-1}$ ) |
|---------------|------------------------------------------------------------------------|------------------------------------------------------|------------------------------------------------------|
| o-add         | $5.21 \times 10^{-17}$                                                 | $1.68 \times 10^3$                                   | $5.98 \times 10^4$                                   |
| o2-add        | $9.25 \times 10^{-17}$                                                 | $1.32 \times 10^3$                                   | $5.98 \times 10^4$                                   |
| m-add         | $2.01 \times 10^{-16}$                                                 | $2.81 \times 10^3$                                   | $1.17 \times 10^4$                                   |
| m2-add        | $1.44 \times 10^{-16}$                                                 | $1.61 \times 10^3$                                   | $1.17 \times 10^4$                                   |
| p-add         | $2.10 \times 10^{-16}$                                                 | $2.11 \times 10^3$                                   | $1.10 \times 10^4$                                   |
| H-abs         | $9.41 \times 10^{-18}$                                                 | $2.14 \times 10^{-1}$                                |                                                      |
